# Supplementary material for: Percentiler and Flagger – low-cost, on-line monitoring of laboratory and manufacturer data and significant surplus to current external quality assessment
Source: publisher site journal article supplement (doi:10.1515/labmed-2018-0030), 2018-06-14
Supplement: Supplementary file 1 [file labmed-2018-0030_suppl.docx]

**Supplement to ʺPercentiler and Flagger – Low-cost, on-line monitoring of laboratory and manufacturer data and significant surplus to current external quality assessmentʺ**

Linda M Thienpont, Dietmar Stöckl

**Figure 1S.** Geographical distribution of the Percentiler and Flagger participants in Belgium (where the development of the Percentiler/Flagger applications was initiated).


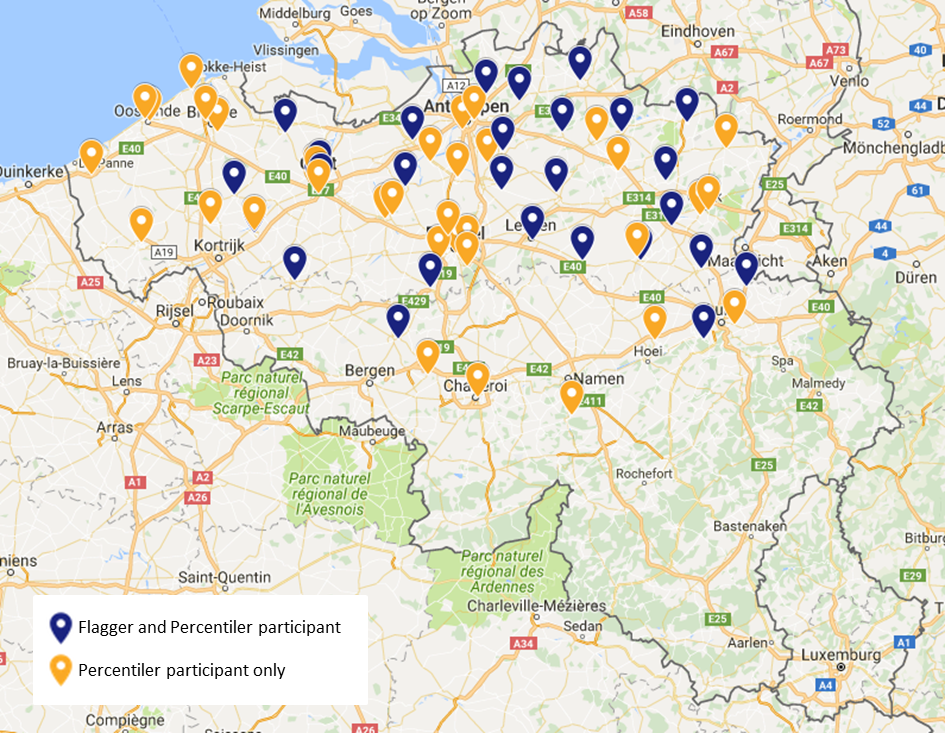


**Figure 2S.** Worldwide geographical distribution of the Percentiler and Flagger participants.


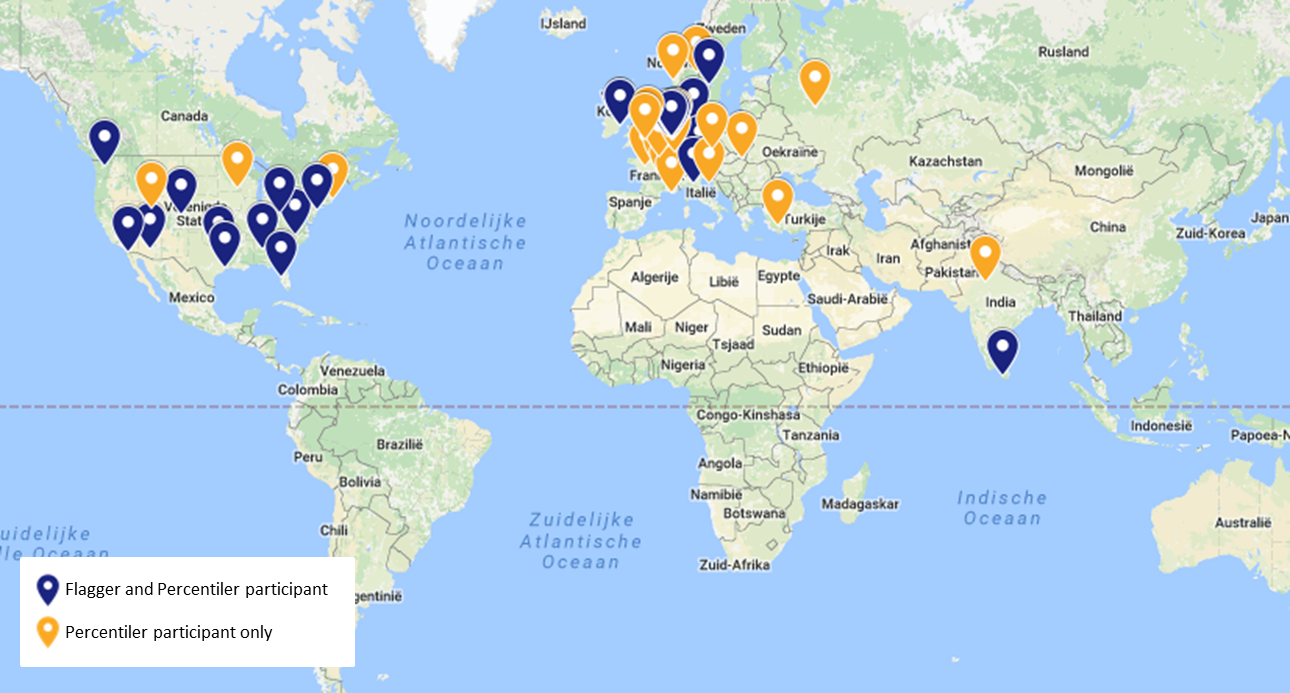


**Figure 3S.** The Flagger charts show (i) the moving median of daily hypo- and hyper-percentage of the selected medical devices over the selected period (full colored lines); (ii) the long-term median (long-broken grey line) and the stability limits proposed for the respective analyte (short-broken grey lines; the area in-between is shaded); (iii) the all or peer group moving median (black broken line).


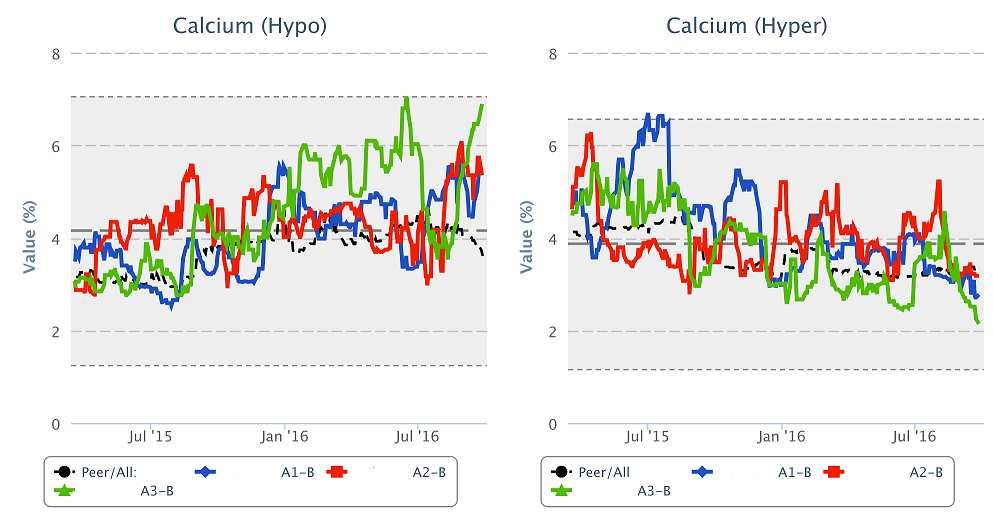


**Figure 4S.** The figure shows a drift of albumin values from ~ 39 g/L to ~35 g/L, followed by a shift back to ~38 g/L. The hypo flagging rate increases from ~20% to ~42% and falls back to ~20%. This laboratory has, like most laboratories, no hyper flagging for albumin. Note, the Percentiler limit is 1 g/L (= 2.3%; “desirable” = 1.4%) and the Flagger limit is 50% of the long-term flagging median observed in the concerned laboratory.

**Figure 5S.** ALP assays are among the most stable assays across laboratories and manufacturers. The figure here shows several moderate shifts of the alkaline phosphatase values, first the values drop from ~73U/L to ~68 U/L, second they go up to ~76 U/L, third they fall to ~70 U/L and fourth return to ~73U/L. The hypo flagging rate is very low, as mostly is the case. The hyper flagging rate varies concordantly with the analytical shifts between ~3 % to ~5%. Note, the Percentiler limit is 5 U/L (= 6.8%; “desirable” = 6.7%) and the Flagger limit is 30% of the long-term flagging median observed in the concerned laboratory.

**Figure 6S.** The figure shows a drift of the ALT values from ~24 U/L to ~18 U/L and a sharp shift to ~30 U/L. The hypo flagging rate increases from ~10% to ~28% and drops to 0%. The hyper flagging rate drops from ~7% to nearly 0% and increases, again, to ~8%. Note, the Percentiler limit is 2 U/L (= 9.5%; “desirable” = 11.5%) and the Flagger limit is 30% of the long-term flagging median observed in the concerned laboratory.

**Figure 7S.** The figure shows AST values varying from ~20 U/L to ~24 U/L and back to ~20 U/L. The hypo flagging rate decreases concordantly with the analytical variation from ~13% to ~4% and increases again to ~22%. The hyper flagging rate slightly drops from ~8% to ~6%. Note, the Percentiler limit is 1.5 U/L (= 6.5%; “desirable” = 6.5%) and the Flagger limit is 30% of the long-term flagging median observed in the concerned laboratory.

**Figure 8S.** The total-bilirubin assay is among the most stable assays across manufacturers and laboratories; typically, the limits are never violated. The figure shows total bilirubin values shifting from ~6.8 µmol/L up to ~7.5 µmol/L; then they decrease to ~7.0 µmol/L followed by an increase to ~7.6 µmol/L. The hyper flagging rate is concordantly affected by both analytical shift as it goes from ~2.5% up to nearly 4% and comes back to ~3%. As expected, the hypo flagging rate is almost zero %. Note, the Percentiler limit is 1 µmol/L (= 10%; “desirable” = 9.0%) and the Flagger limit is 30% of the long-term flagging median observed in the concerned laboratory.

**Figure 9S.** The figure shows moderately varying calcium values, i.e. they first shift upwards from ~2.33 mmol/L to ~2.38 mmol/L then they fall back to 2.33 mmol/L, gradually increase a second time to ~2.42 mmol/L, to finally drop back to 2.30 mmol/L. The hypo flagging rate drops more strongly with the analytical shifts from ~13% to ~ 3%, then increases to ~9%, falls back to 4% to finally increase a second time to ~15%. The hyper flagging rate is very low so that no effects are observed. Note, the Percentiler limit is 0.04 mmol/L (= 1.7%; “desirable” = 0.8%) and the Flagger limit is 70% of the long-term flagging median observed in the concerned laboratory.

**Figure 10S.** The figure shows 2 shifts in the chloride values, i.e., from ~ 103 mmol/L to ~100.5 mmol/L, and to ~99 mmol/L. The hypo flagging rate is most influenced by both analytical shifts as it increases from ~5% to ~21%. The hyper flagging rate decreases by the first downward shift from ~2% to nearly 0%. Note, the Percentiler limit is 1 mmol/L (= 1.0%; “desirable” = 0.5%) and the Flagger limit is 50% of the long-term flagging median observed in the concerned laboratory.

**Figure 11S.** The figure shows a major shift in total cholesterol values from ~4.7 mmol/L to ~4.4 mmol/L. The hypo flagging rate is nearly unaffected and in the order of ~1%, while the hyper flagging rate decreases from ~36% to nearly 23%. Note, the Percentiler limit is 0.2 mmol/L (= 3.8%; “desirable” = 4.1%) and the Flagger limit is 20% of the long-term flagging median observed in the concerned laboratory.

**Figure 12S.** The figure shows 4 major shifts in the CRP values, i.e., from ~7.0 mg/L to ~ 9.9 mg/L, then down to ~5.8 mg/L, up to ~9.5 mg/Land down to ~5 mg/L. The hyper flagging rate is influenced by the analytical shifts as it first increases from ~35% to ~48%, then drops to ~28% to increase again to ~35-45%, and then decreases to ~15-20%. The hypo flagging rate is and remains zero as expected. Note, the Percentiler limit is 0.25 mg/L (= 9.6%; “desirable” = 21.8%) and the Flagger limit is 30% of the long-term flagging median observed in the concerned laboratory.

**Figure 13S.** The figure shows drifting creatinine values from ~84 µmol/L down to ~74 µmol/L, followed by a shift to~78 µmol/L. The hypo flagging increases concordantly with the drift from ~3% to ~7.5% to normalize again to ~3%. The hyper flagging rate gradually decreases from ~15% down to nearly 8% and then normalizes to ~11%. Note, the Percentiler limit is 3 µmol/L (= 3.9%; “desirable” = 4.0%) and the Flagger limit is 30% of the long-term flagging median observed in the concerned laboratory.

**Figure 14S.** The figure shows FT4 values drifting and shifting from 15.5 pmol/L up to 17 pmol/L. The hypo flagging rates decrease from ~10% to ~0%, while the opposite happens for the hyper flagging rate (increases from ~8% to nearly 16%). Note, the Percentiler limit is 0.5 pmol/L (= 3.3%; “desirable” = 3.3%) and the Flagger limit is 30% of the long-term flagging median observed in the concerned laboratory.

**Figure 15S.** The figure shows a downward shift in GGT values from ~28 U/L to ~24U/L. The hypo flagging rate increases concordantly with the analytical shift from ~ 3% to ~10%. The hyper flagging rate drops from ~22% to nearly 10%. Note, the Percentiler limit is 2 U/L (= 9.1%; “desirable” = 11.1%) and the Flagger limit is 30% of the long-term flagging median observed in the concerned laboratory.

**Figure 16S.** Figure 2 shows 3 shifts in glucose values, i.e., a first time from ~5.1 mmol/L to ~5.3 mmol/L, then a shortly lasting shift up to 5.5 mmol/L followed by a return to ~5.4 mmol/L, and finally a third shift up to ~5.6 mmol/L. The hypo flagging rate is little affected and is in the order of 1 to 2%, while the hyper flagging rate mainly increases due to the last upwards shift from ~35% to nearly 55%. Note, the Percentiler limit is 0.15 mmol/L (= 3.1%; “desirable” = 2.3%) and the Flagger limit is 20% of the long-term flagging median observed in the concerned laboratory.

**Figure 17S.** The figure shows drifting LDH values from ~200 U/L up to to ~230 U/L. The hyper flagging rate gradually increases from ~18% to nearly 33%. As is the case for other enzymes, the hypo flagging rate is nearly 0%. Note, the Percentiler limit is 8 U/L (= 4.6%; “desirable” = 4.3%) and the Flagger limit is 30% of the long-term flagging median observed in the concerned laboratory.

**Figure 18S.** The figure shows several shifts in the magnesium values, i.e., a first drop from ~0.83 mmol/L to ~0.79 mmol/L, followed by an increase to ~0.84 mmol/L, to drop back to ~0.81 mmol/L and finally increase to 0.835 mmol/L. The hypo flagging rate decreases from ~7.5% to ~2.5%, then returns to ~7.5-9.0%, comes down to ~2.5%, to normalize again to ~7.5%. The hyper flagging rate is nearly 0%. Note, the Percentiler limit is 0.02 mmol/L (= 3.0%; “desirable” = 1.8%) and the Flagger limit is 70% of the long-term flagging median observed in the concerned laboratory.

**Figure 19S.** The figure shows several shifts in the inorganic phosphor values, the major ones being from ~1.13 mmol/L to ~1.03 mmol/L and back to ~1.17 mmol/L. The hypo flagging rate concordantly increases from ~2% to ~12% and drops back to ~2%. The hyper flagging rate mainly decreases due to the downwards analytical shift from ~7% to nearly 2.5%. Note, the Percentiler limit is 0.05 mmol/L (= 4.4%; “desirable” = 3.4%) and the Flagger limit is 50% of the long-term flagging median observed in the concerned laboratory.

**Figure 20S.** The potassium assay is among the most stable assays across manufacturers and laboratories; typically, the limits are never violated. The figure shows potassium values going down from ~ 4.15 mmol/L to ~4.05 mmol/L. The hypo flagging rate increase concordantly from ~3% to ~5%, while the inverse happens for the hyper flagging rate decreasing from ~7% to nearly 4%. Note, the Percentiler limit is 0.1 mmol/L (= 2.4%; “desirable” = 1.8%) and the Flagger limit is 30% of the long-term flagging median observed in the concerned laboratory.

**Figure 21S.** The figure shows a major shift in the total protein values from ~67.5 g/L to ~70.5 g/L. The hypo flagging rate decreases concordantly from ~5% to ~2%. The hyper flagging rate triplicates (from ~0.2% to nearly 0.6%), however, is generally low. Note, the Percentiler limit is 1 g/L (= 1.4%; “desirable” = 1.4%) and the Flagger limit is 50% of the long-term flagging median observed in the concerned laboratory.

**Figure 22S.** The figure shows a drift in sodium values from ~140 mmol/L up to ~141.4 mmol/L, followed by a downwards shift to ~139 mmol/L, and a normalization back to 141.5 mmol/L. The hypo flagging rate is affected by the shift and changes from ~2% to ~5%, and normalizes back to ~2%. The hyper flagging rate is affected by the drift as it increases from ~3% up to ~12%; due to the downward shift it drops from ~12% to nearly 2% and then increases back to ~12%. Note, the Percentiler limit is 1 mmol/L (= 0.7%; “desirable” = 0.2%) and the Flagger limit is 70% of the long-term flagging median observed in the concerned laboratory.

**Figure 23S.** The figure shows variable TSH values ~1.8 mIU/L to ~1.55 mIU/L. The hypo flagging rate follows the trend grossly and varies between ~5% and 12%. The hyer flagging rate follows the analytical trend nicely and varies between ~7% and 13%. Note, the Percentiler limit is 0.12 mmol/L (= 7.7%; “desirable” = 7.8%) and the Flagger limit is 30% of the long-term flagging median observed in the concerned laboratory.

**Figure 24S.** The figure shows drifting urea values from ~5.2 mmol/L to ~4.6 mmol/L and, finally slightly increasing to ~4.8 mmol/L. The hypo flagging rate <1% gradually increases up to ~2.5% and levels off at ~1.5%, while the hyper flagging rate decreases from ~12% to nearly 7.5%. Note, the Percentiler limit is 0.3 mmol/L (= 6.0%; “desirable” = 5.6%) and the Flagger limit is 30% of the long-term flagging median observed in the concerned laboratory.

**Figure 25S.** The figure shows a downward and upward shift in the uric acid values from ~335 µmol/L to ~315 µmol/L and back to ~340 µmol/L. Due to the downward analytical shifts, the hyper flagging rate at ~7% falls to ~2.5%; it returns to nearly 7% after the upwards shift. As expected, the hypo flagging rate is very low and little affected by the variation and varies between 0 and 1%. Note, the Percentiler limit is 15 µmol/L (= 4.8%; “desirable” = 4.9%) and the Flagger limit is 50% of the long-term flagging median observed in the concerned laboratory.
